# Supplementary material for: Leveraging machine learning for quantitative precipitation estimation from Fengyun-4 geostationary observations and ground meteorological measurements
Source: Copernicus journal article supplement (doi:10.5194/amt-14-7007-2021), 2021-11-05
Supplement: Supplementary file 1 [file amt-14-7007-2021-supplement.pdf]

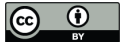

*Supplement of*

## **Leveraging machine learning for quantitative precipitation estimation from Fengyun-4 geostationary observations and ground meteorological measurements**

**Xinyan Li et al.**

*Correspondence to:* Yuanjian Yang (yyj1985@nuist.edu.cn)

The copyright of individual parts of the supplement might differ from the article licence.

1 **Figures and Tables**

2 **Table S1: Classification of rainfall levels in different periods (Unit: mm)**

| Level                   | Rainfall in different periods |                      |
|-------------------------|-------------------------------|----------------------|
|                         | Rainfall in 1 hours           | Rainfall in 24 hours |
| light rainfall          | < 0.1                         | < 0.1                |
| Light rain              | 0.1 ~ 1.5                     | 0.1 ~ 9.9            |
| Moderate rain           | 1.6 ~ 6.9                     | 10.0 ~ 24.9          |
| Heavy rain              | 7.0 ~ 14.9                    | 25.0 ~ 49.9          |
| Rainstorm               | 15.0 ~ 39.9                   | 50.0 ~ 99.9          |
| Heavy rainstorm         | 40.0 ~ 49.9                   | 100.0 ~ 249.9        |
| Extraordinary rainstorm | $\geq 50.0$                   | $\geq 250.0$         |

3

4

5

6

**Table S2: Wavelengths of the 14 channels of the Fengyun-4 satellite and their application**

| Channel               | NO. | Band ( $\mu\text{m}$ ) | Application                |
|-----------------------|-----|------------------------|----------------------------|
| Visible&Near-Infrared | 1   | 0.47                   | Cloud, Aerosol             |
|                       | 2   | 0.65                   | Cloud, Snow                |
|                       | 3   | 0.825                  | Cloud, Aerosol, Vegetation |
|                       | 4   | 1.375                  | Cirrus                     |
|                       | 5   | 1.61                   | Cloud, Snow                |
|                       | 6   | 2.25                   | Cirrus, Aerosol            |
| Shortwave Infrared    | 7   | 3.75H                  | Fire                       |
|                       | 8   | 3.75L                  | Clouds, Fog                |
| Water Vapor           | 9   | 6.25                   | WV                         |
|                       | 10  | 7.1                    | WV                         |
| Longwave Infrared     | 11  | 8.5                    | Sand dust                  |
|                       | 12  | 10.7                   | Cloud                      |
|                       | 13  | 12.0                   | Cloud                      |
|                       | 14  | 13.5                   | Cloud                      |

7

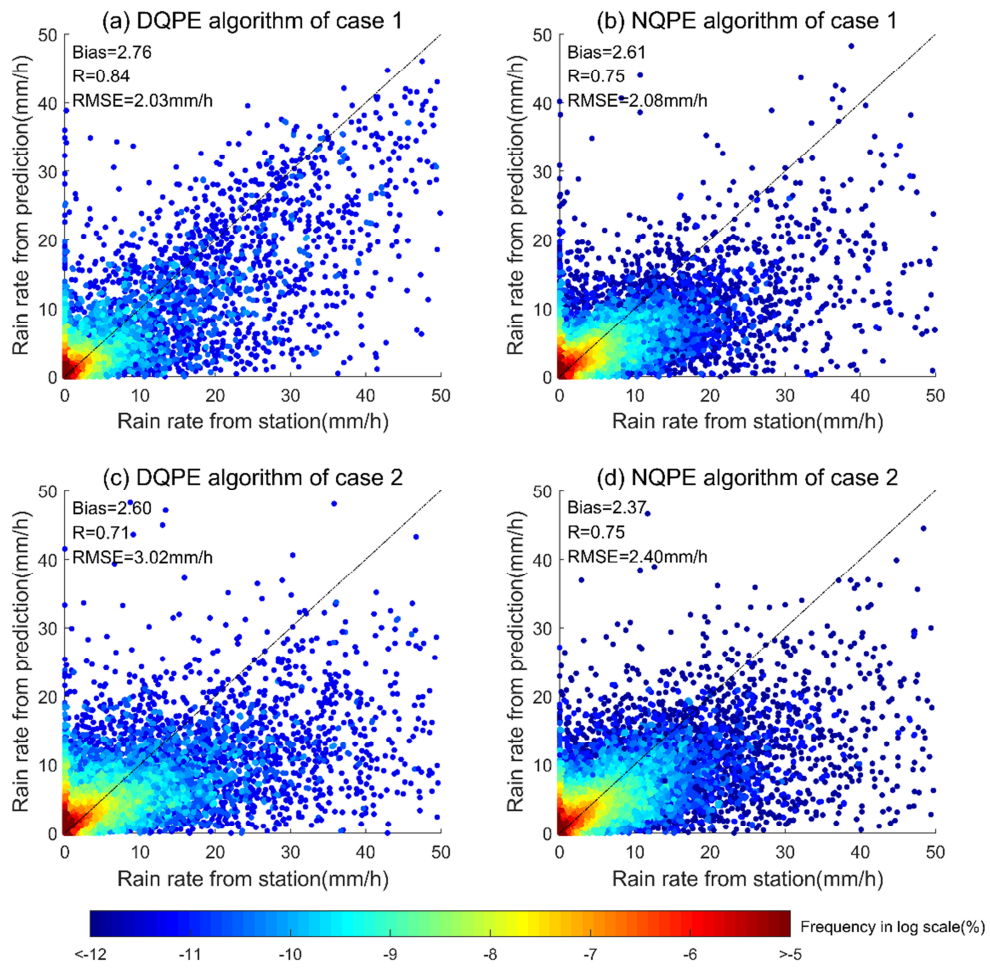

8

9 **Figure S1: Comparison of the precipitation measured by high-density automatic stations and that estimated by**  
 10 **the QPE algorithm: (a) DQPE algorithm of case 1; (b) NQPE algorithm of case 1; (c) DQPE algorithm of case 2;**  
 11 **(d) NQPE algorithm of case 2**

12

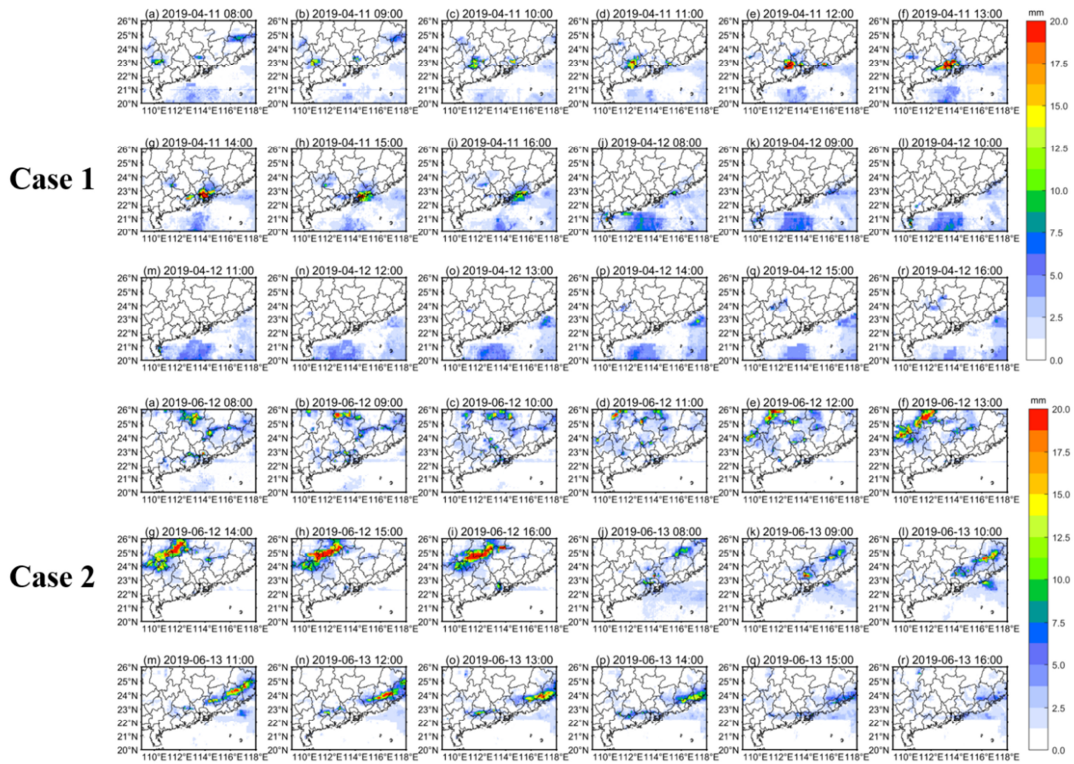

15 **Figure S2: Estimated precipitation of the DQPE algorithm: Case 1: (a–i) at 0800–1600 BJT on April 11; (j–r) at**  
 16 **0800–1600 BJT on April 12. Case 2: (a–i) at 0800–1600 BJT on June 12; (j–r) at 0800–1600 BJT on June 13.**

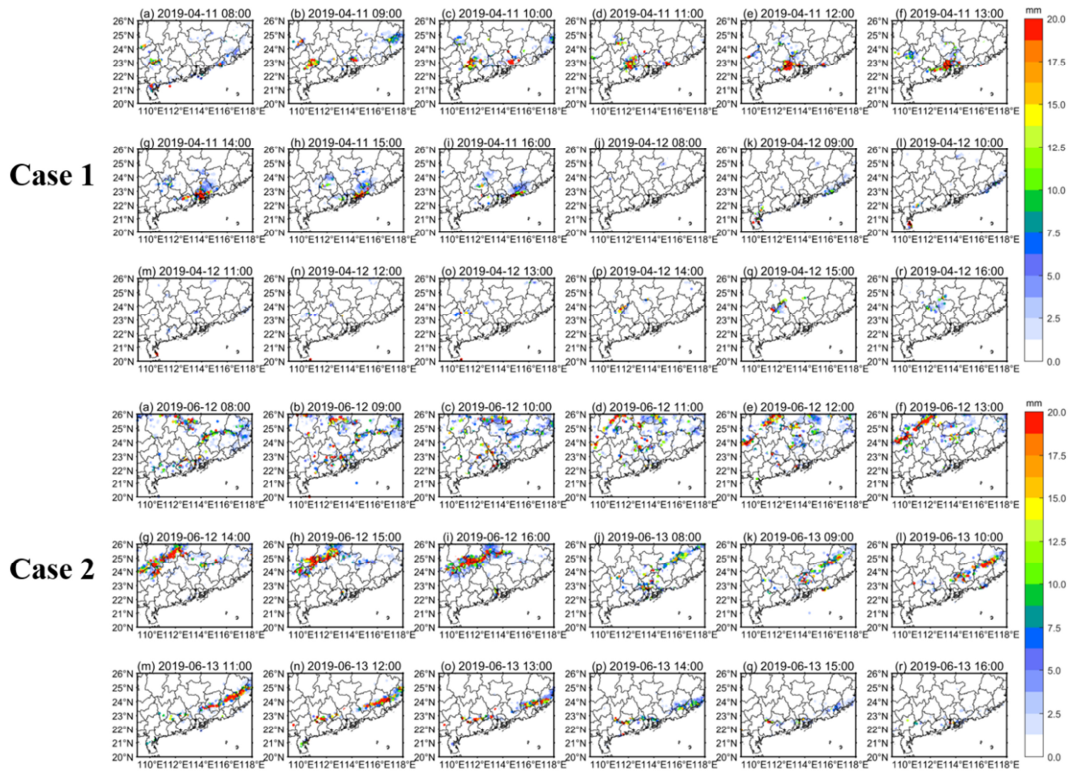

20 **Figure S3: Actual precipitation based on the high-density automatic stations: Case 1: (a–i) at 0800–1600 BJT on**  
 21 **April 11; (j–r) at 0800–1600 BJT on April 12. Case 2: (a–i) at 0800–1600 BJT on June 12; (j–r) at 0800–1600 BJT**  
 22 **on June 13.**

**Case 1**

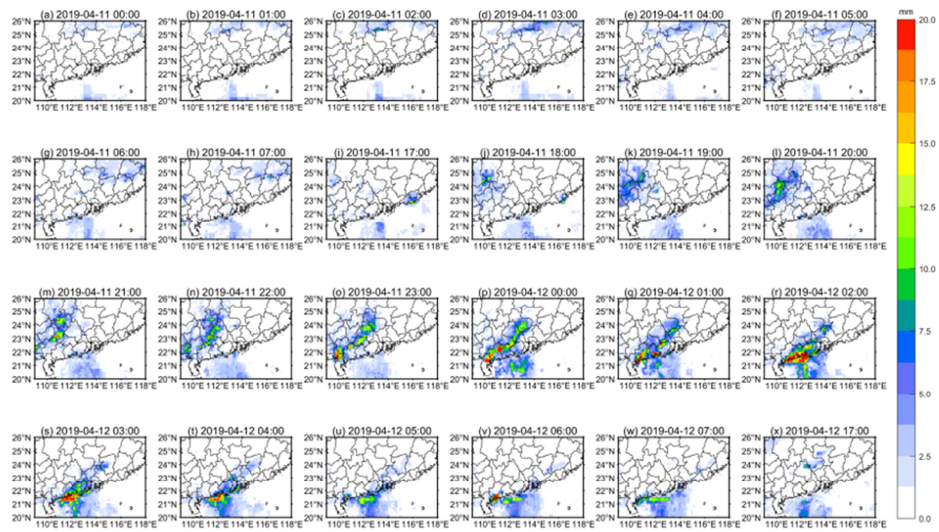

**Case 2**

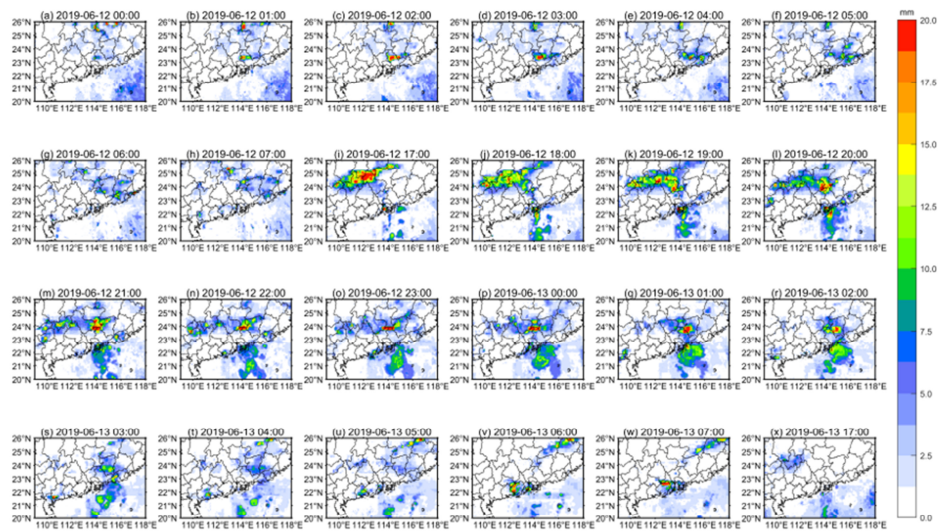

**Case 1**

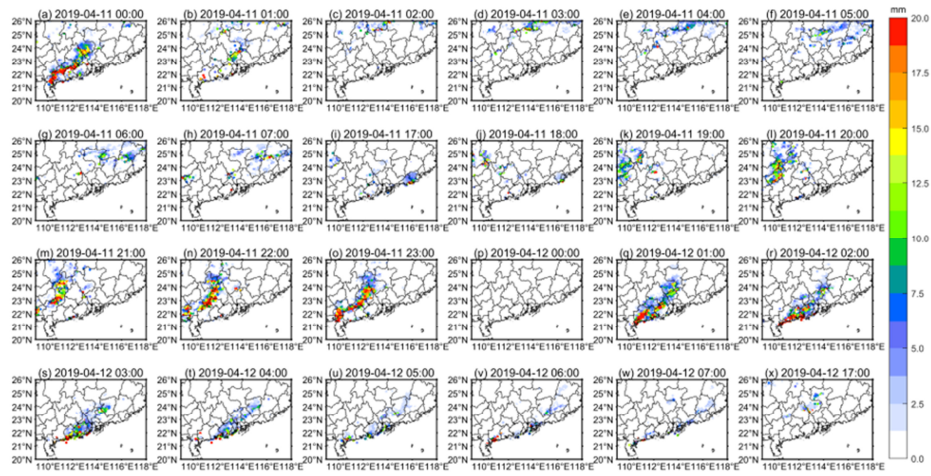

**Case 2**

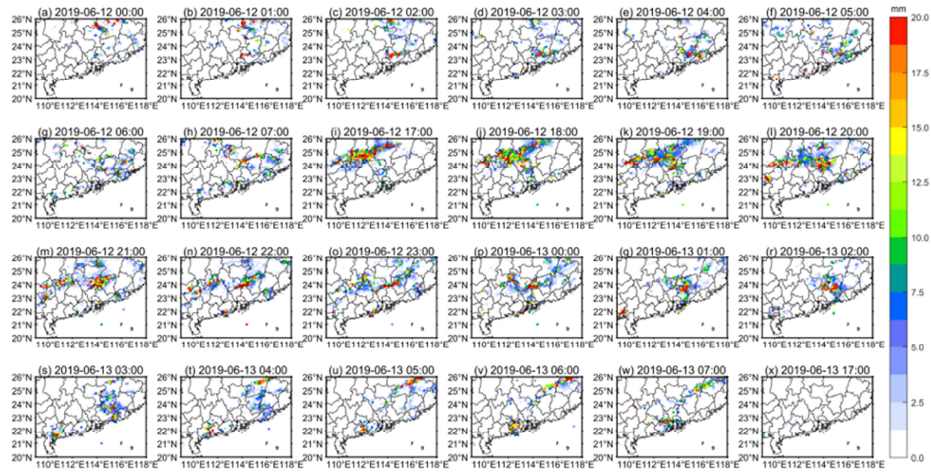

33 **Figure S5: Actual precipitation based on the high-density automatic stations: Case 1: (a–h) 0000–0700 BJT on**  
 34 **April 11, (i–o) 1700–2300 BJT on April 11, (p–w) 0000–0700 BJT on April 12, and (x) 1700 BJT on April 12.**

35 **Case 2: (a–h) 0000–0700 BJT on June 12, (i–o) 1700–2300 BJT on June 12, (p–w) 0000–0700 BJT on June 13,**  
 36 **and (x) 1700 BJT on June 13.**



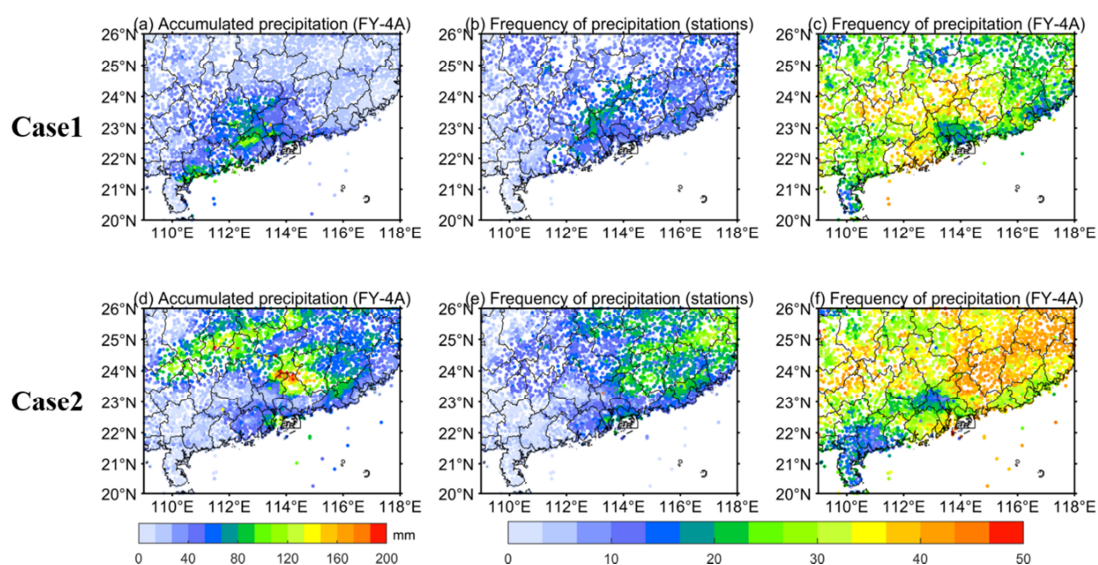

39

40 **Figure S6: Spatial distribution of accumulated precipitation: (a) accumulated precipitation estimated by the**  
 41 **QPE algorithm in case 1; (b) actual precipitation frequency observed by high-density automatic stations in case**  
 42 **1; (c) precipitation frequency estimated by the QPE algorithm in case 1; (d) accumulated precipitation estimated**  
 43 **by the QPE algorithm in case 2; (e) actual precipitation frequency observed by high-density automatic stations**  
 44 **in case 2; (f) precipitation frequency estimated by the QPE algorithm in case 2.**

45

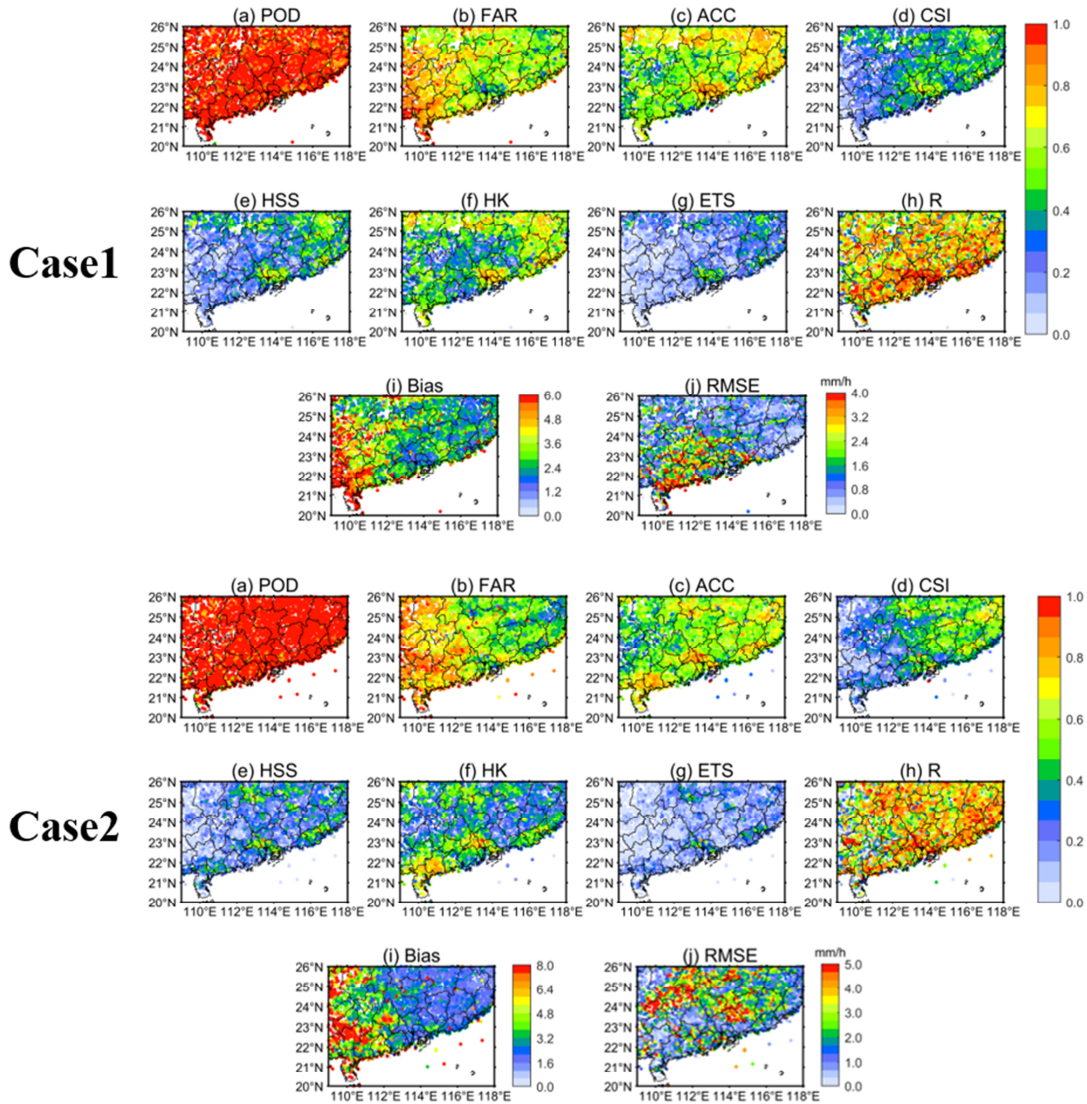

47

48 **Figure S7: Spatial distribution of evaluation indicators of the QPE algorithm for all stations: Case 1: (a) *POD*; (b)**  
 49 ***FAR*; (c) *ACC*; (d) *CSI*; (e) *HSS*; (f) *HK*; (g) *ETS*; (h) *R*; (i) *Bias*; (j) *RMSE*. Case 2:(a) *POD*; (b) *FAR*; (c) *ACC*;**  
 50 ***(d) *CSI*; (e) *HSS*; (f) *HK*; (g) *ETS*; (h) *R*; (i) *Bias*; (j) *RMSE*.***

51

52

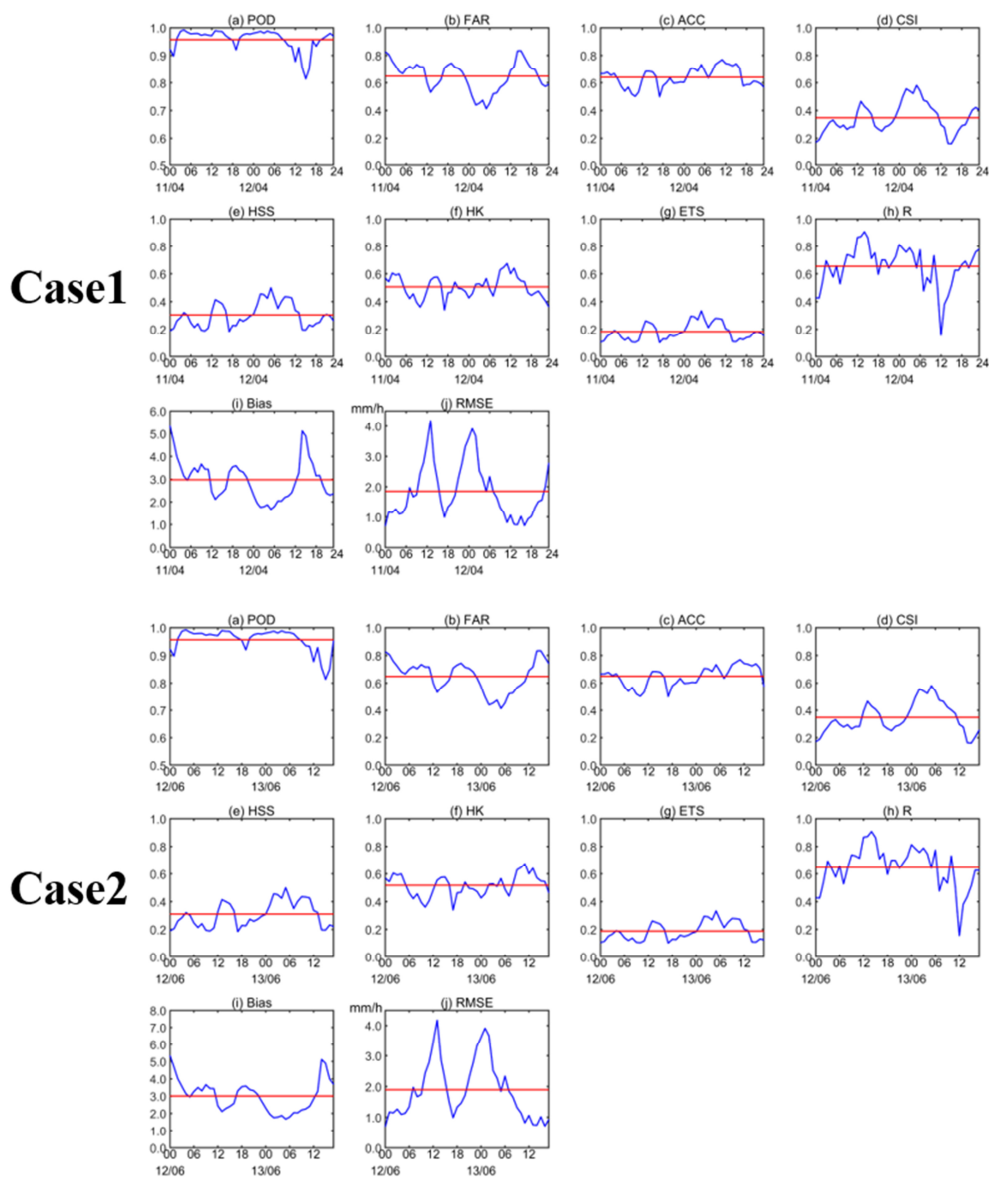

54

55 **Figure S8: Time series of evaluation indicators of the QPE algorithm for all stations at each time: Case 1: (a)**56 ***POD*; (b) *FAR*; (c) *ACC*; (d) *CSI*; (e) *HSS*; (f) *HK*; (g) *ETS*; (h) *R*; (i) *Bias*; (j) *RMSE*. Case 2:(a) *POD*; (b) *FAR*;**57 **(c) *ACC*; (d) *CSI*; (e) *HSS*; (f) *HK*; (g) *ETS*; (h) *R*; (i) *Bias*; (j) *RMSE*.**

58
